# Supplementary material for: MeCP2 in cholinergic interneurons of nucleus accumbens regulates fear learning
Source: eLife. 2020 May 18;9:e55342. doi: 10.7554/eLife.55342 (PMC7259956; doi:10.7554/eLife.55342)
Supplement: Figure 1—source data 1. [file elife-55342-fig1-data1.xlsx]

## Sheet: Table S3
Figure 1-Source data 1: Statistical reporting of Figure 1
Assay	Measurement	N	Values (mean±s.e.m.)	Statistical test and P value	Post hoc test and P value	Figure
Percentage of MeCP2 expression in NAc or BF of Chat-IRES-Cre or Chat-Mecp2-/y mice	MeCP2 expression in NAc	Chat-cre=6 sections from 4 mice	100.0 ± 0.0	Two-tailed Unpaired t test		Fig. 1E
		cKO=7 sections from 3 mice	1.466 ± 0.9468	t=95.73 df=11 p < 0.0001
	MeCP2 expression in BF	Chat-cre=4 sections from 4 mice	100.0 ± 0.0	Two-tailed Unpaired t test
		cKO=3 sections from 3 mice	3.516 ± 0.4092	t=281.8 df=5 p < 0.0001
fear learning	freezing time(%)	WT=13		Two-way RM ANOVA		Fig. 1F
		Chat cre=15		p=0.0565
		Mecp2flox/y=15		F (9, 153) = 1.895
		Chat-Mecp2-/y=12
fear condition test	freezing time(%) context fear	WT=13	40.46±4.447	one-way ANOVA with Bonferroni's multiple comparisons test	cKO vs. WT=0.0085	Fig. 1G
		Chat cre=15	36.41±5.532	P = 0.0075	cKO vs. Chat-cre=0.0399
		Mecp2flox/y=15	35.9±3.639	F (3, 51) = 4.445	cKO vs. Mecp2flox/y=0.0497
		Chat-Mecp2-/y=12	19.01±2.062
	freezing time(%) tone fear	WT=13	78.46±4.241	one-way ANOVA with Bonferroni's multiple comparisons test	cKO vs. WT=0.05	Fig. 1H
		Chat cre=15	78.49±3.293	P = 0.0132	cKO vs. Chat-cre=0.0426
		Mecp2flox/y=15	79.78±3.072	F (3, 51) = 3.941	cKO vs. Mecp2flox/y=0.0219
		Chat-Mecp2-/y=12	63.57±4.403
Trial 4 during learning	freezing time(%)	All Three controls=43	55.44±4.325	Two-tailed Unpaired t test		Fig. 1-fig. supplement 1A
		Chat-Mecp2-/y=12	34.68±8.426	t=2.228, df=53 p=0.0302
fear condition test	normalized freezing time context fear	WT=13	0.6687±0.07350	one-way ANOVA with Bonferroni's multiple comparisons test	cKO vs. WT> 0.9999	Fig. 1-fig. supplement 1B
		Chat cre=15	0.6046±0.09186	P = 0.3975	cKO vs. Chat-cre> 0.9999
		Mecp2flox/y=15	0.7015±0.07111	F (3, 51) = 1.007	cKO vs. Mecp2flox/y=0.6625
		Chat-Mecp2-/y=12	0.5231±0.05674
	normalized freezing time tone fear	WT=13	1.297±0.07009	one-way ANOVA with Bonferroni's multiple comparisons test	cKO vs. WT=0.0006	Fig. 1-fig. supplement 1C
		Chat cre=15	1.303±0.05469	P = 0.0002	cKO vs. Chat-cre=0.0005
		Mecp2flox/y=15	1.559±0.06002	F (3, 51) = 7.729	cKO vs. Mecp2flox/y=0.2672
		Chat-Mecp2-/y=12	1.749±0.1211
pain threshold	current intensity in flinch(mA)	Chat cre=15	0.1367±0.01241	one-way ANOVA with Bonferroni's multiple comparisons test	Chat vs. Mecp2flox/y=0.6816	Fig. 1-fig. supplement 1D
		Mecp2flox/y=11	0.1636±0.009749	P = 0.4563	Chat vs. cKO> 0.9999
		Chat-Mecp2-/y=13	0.1538±0.02077	F (2, 36) = 0.8018	Mecp2flox/y vs. cKO> 0.9999
	current intensity in jump(mA)	Chat cre=15	0.2267±0.01881	one-way ANOVA with Bonferroni's multiple comparisons test	Chat vs. Mecp2flox/y=0.2116
		Mecp2flox/y=11	0.285±0.01979	P = 0.1743	Chat vs. cKO> 0.9999
		Chat-Mecp2-/y=13	0.2385±0.02478	F (2, 35) = 1.837	Mecp2flox/y vs. cKO=0.4725
	current intensity in vocal(mA)	Chat cre=15	0.3542±0.03105	one-way ANOVA with Bonferroni's multiple comparisons test	Chat vs. Mecp2flox/y=0.6627
		Mecp2flox/y=11	0.3±0.03005	P = 0.3650	Chat vs. cKO=0.7073
		Chat-Mecp2-/y=13	0.3045±0.02817	F (2, 29) = 1.044	Mecp2flox/y vs. cKO> 0.9999
Open field	total distance(m)	Chat cre=5	31.75 ± 5.618	Two-tailed Unpaired t test		Fig. 1-fig. supplement 1E
		Chat-Mecp2-/y=5	29.58 ± 3.419	t=0.3300 df=8 p=0.7499
	percentage immobility time(%)	Chat cre=5	15.95 ± 3.127	Two-tailed Unpaired t test		Fig. 1-fig. supplement 1F
		Chat-Mecp2-/y=5	24.43 ± 7.821	t=1.007 df=8 p=0.3436
Y maze	self alteration(%)	Chat cre=5	42.69 ± 3.051	Two-tailed Unpaired t test		Fig. 1-fig. supplement 1G
		Chat-Mecp2-/y=5	46.66 ± 3.331	t=0.8772 df=8 p=0.4059
