# Supplementary material for: MeCP2 in cholinergic interneurons of nucleus accumbens regulates fear learning
Source: eLife. 2020 May 18;9:e55342. doi: 10.7554/eLife.55342 (PMC7259956; doi:10.7554/eLife.55342)
Supplement: Figure 2—source data 1. [file elife-55342-fig2-data1.xlsx]

## Sheet: Table S3
Figure 2-Source data 1: Statistical reporting of Figure 2
Assay	Measurement	N	Values (mean±s.e.m.)	Statistical test and P value	Post hoc test and P value	Figure
Restoration of MeCP2 in NAc in Chat-Mecp2-/y-AAV/Mecp2 mice	percentage of ChAT-positive cells in NAc co-expressing overexpression virus	10 mice	85.46 ± 4.223			Fig. 2B
	efficiency of MeCP2 restoration in GFP-positive neurons	10 mice	73.73 ± 6.254
Restoration of MeCP2 in NAc fear condition test	freezing time(%) context fear	Chat-IRES-Cre-AAV/GFP=11	44.09±8.170	one-way ANOVA with Bonferroni's multiple comparisons test	cKO-con vs. Chat-con=0.0027	Fig.2C
		Chat-Mecp2-/y-AAV/GFP=9	13.54±2.998	P = 0.0029	cKO-con vs. cKO-rescue=0.05
		Chat-Mecp2-/y-AAV/Mecp2=10	24.23±3.352	F (2, 27) = 7.304
	freezing time(%) tone fear	Chat-IRES-Cre-AAV/GFP=11	61.98±3.235	one-way ANOVA with Bonferroni's multiple comparisons test	cKO-con vs. Chat-con=0.0010	Fig.2D
		Chat-Mecp2-/y-AAV/GFP=9	20.15±6.052	P = 0.0014	cKO-con vs. cKO-rescue=0.05
		Chat-Mecp2-/y-AAV/Mecp2=10	43.67±6.626	F (2, 27) = 8.469
Restoration of MeCP2 in BF fear condition test	freezing time(%) context fear	Chat-IRES-Cre-AAV/GFP=15	41.20±4.105	one-way ANOVA with Bonferroni's multiple comparisons test	cKO-con vs. Chat-con=0.0008	Fig.2E
		Chat-Mecp2-/y-AAV/GFP=8	15.97±4.915	P < 0.0001	cKO-con vs. cKO-rescue> 0.9999
		Chat-Mecp2-/y-AAV/Mecp2=11	14.59±3.276	F (2, 31) = 14.52
	freezing time(%) tone fear	Chat-IRES-Cre-AAV/GFP=15	75.05±2.828	one-way ANOVA with Bonferroni's multiple comparisons test	cKO-con vs. Chat-con=0.0349	Fig.2F
		Chat-Mecp2-/y-AAV/GFP=8	58.38±6.650	P = 0.0013	cKO-con vs. cKO-rescue> 0.9999
		Chat-Mecp2-/y-AAV/Mecp2=11	53.35±4.362	F (2, 31) = 8.261
Restoration of MeCP2 in NAc Trial 4 during learning	freezing time(%)	Chat-IRES-Cre-AAV/GFP=11	56.49±4.193	one-way ANOVA with Bonferroni's multiple comparisons test	cKO-con vs. Chat-con=0.0060	Fig.2-fig. supplement 3A
		Chat-Mecp2-/y-AAV/GFP=9	38.87±3.577	P = 0.0073	cKO-con vs. cKO-rescue=0.0241
		Chat-Mecp2-/y-AAV/Mecp2=10	53.75±3.417	F (2, 27) = 5.929
Restoration of MeCP2 in BF Trial 4 during learning	freezing time(%)	Chat-IRES-Cre-AAV/GFP=15	61.75±5.985	one-way ANOVA with Bonferroni's multiple comparisons test	cKO-con vs. Chat-con=0.0461	Fig.2-fig. supplement 3B
		Chat-Mecp2-/y-AAV/GFP=8	36.25±8.076	P = 0.0232	cKO-con vs. cKO-rescue> 0.9999
		Chat-Mecp2-/y-AAV/Mecp2=11	37.95±8.096	F (2, 31) = 4.258
