# Supplementary material for: MeCP2 in cholinergic interneurons of nucleus accumbens regulates fear learning
Source: eLife. 2020 May 18;9:e55342. doi: 10.7554/eLife.55342 (PMC7259956; doi:10.7554/eLife.55342)
Supplement: Figure 3—source data 1. [file elife-55342-fig3-data1.xlsx]

## Sheet: Table S3
Figure 3-Source data 1: Statistical reporting of Figure 3
Assay	Measurement	N	Values (mean±s.e.m.)	Statistical test and P value	Statistical test and P value	Figure
Averaged frequency measured in a cell-attached configuration	firing frequency(Hz)	Chat cre=18 neurons from 3 mice	4.948±0.5097	one-way ANOVA with Bonferroni's multiple comparisons test	Chat vs. MeCP2-Flox> 0.9999	Fig.3B
		Mecp2flox/y= 13 neurons from 3 mice	4.815±0.3847	P < 0.0001	Chat vs. cKO< 0.0001
		Chat-Mecp2-/y=13 neurons from 5 mice	2.026±0.2325	F (2, 41) = 13.93	MeCP2-Flox vs. cKO=0.0003
Averaged frequency measured in a whole cell configuration	firing frequency(Hz)	Chat cre=16 neurons from 3 mice	4.970±0.7027	one-way ANOVA with Bonferroni's multiple comparisons test	Chat vs. MeCP2-Flox> 0.9999	Fig.3D
		Mecp2flox/y= 13 neurons from 4 mice	4.700±0.4290	P = 0.0096	Chat vs. cKO=0.0109
		Chat-Mecp2-/y=8 neurons from 5 mice	2.019±0.5077	F (2, 34) = 5.336	MeCP2-Flox vs. cKO=0.0294
Intrinsic properties	resting membrane potential (RMP) (mV)	Chat cre=13 neurons from 4 mice	-49.39±1.152	one-way ANOVA with Bonferroni's multiple comparisons test	Chat vs. MeCP2-Flox> 0.9999	Fig. 3-fig. supplement 4A
		Mecp2flox/y=11 neurons from 3 mice	-49.64±2.151	P = 0.9942	Chat vs. cKO> 0.9999
		Chat-Mecp2-/y=11 neurons from 3 mice	-49.51±1.646	F (2, 32) = 0.005866	MeCP2-Flox vs. cKO> 0.9999
	membrane time constant (Tau) (ms)	Chat cre=13 neurons from 4 mice	32.86±2.582	one-way ANOVA with Bonferroni's multiple comparisons test	Chat vs. MeCP2-Flox> 0.9999	Fig. 3-fig. supplement 4B
		Mecp2flox/y=11 neurons from 3 mice	29.34±3.396	P = 0.6894	Chat vs. cKO> 0.9999
		Chat-Mecp2-/y=11 neurons from 3 mice	30.07±3.394	F (2, 32) = 0.3762	MeCP2-Flox vs. cKO> 0.9999
	membrane capacitance (Cm) (pF)	Chat cre=13 neurons from 4 mice	105.3±8.396	one-way ANOVA with Bonferroni's multiple comparisons test	Chat vs. MeCP2-Flox> 0.9999	Fig. 3-fig. supplement 4C
		Mecp2flox/y=11 neurons from 3 mice	113.5±6.999	P = 0.6904	Chat vs. cKO> 0.9999
		Chat-Mecp2-/y=11 neurons from 3 mice	112.7±6.687	F (2, 32) = 0.3748	MeCP2-Flox vs. cKO> 0.9999
	input resistance (Rin) (mΩ)	Chat cre=13 neurons from 4 mice	329.1±26.58	one-way ANOVA with Bonferroni's multiple comparisons test	Chat vs. MeCP2-Flox=0.2719	Fig. 3-fig. supplement 4D
		Mecp2flox/y=11 neurons from 3 mice	261.6±26.49	P = 0.1801	Chat vs. cKO=0.4513
		Chat-Mecp2-/y=11 neurons from 3 mice	272.1±29.83	F (2, 32) = 1.809	MeCP2-Flox vs. cKO> 0.9999
	threshold (mV)	Chat cre=15 neurons from 4 mice	-39.35±1.311	one-way ANOVA with Bonferroni's multiple comparisons test	Chat vs. MeCP2-Flox> 0.9999	Fig. 3-fig. supplement 4E
		Mecp2flox/y=9 neurons from 3 mice	-38.04±2.250	P = 0.3066	Chat vs. cKO=0.9592
		Chat-Mecp2-/y=15 neurons from 5 mice	-41.14±0.7704	F (2, 36) = 1.222	MeCP2-Flox vs. cKO=0.4168
	amplitude (mV)	Chat cre=15 neurons from 4 mice	81.07±3.051	one-way ANOVA with Bonferroni's multiple comparisons test	Chat vs. MeCP2-Flox=0.6617	Fig. 3-fig. supplement 4F
		Mecp2flox/y=9 neurons from 3 mice	76.23±3.230	P = 0.4600	Chat vs. cKO> 0.9999
		Chat-Mecp2-/y=15 neurons from 5 mice	79.81±1.291	F (2, 36) = 0.7935	MeCP2-Flox vs. cKO> 0.9999
	half width (ms)	Chat cre=15 neurons from 4 mice	1.873±0.09723	one-way ANOVA with Bonferroni's multiple comparisons test	Chat vs. MeCP2-Flox> 0.9999	Fig. 3-fig. supplement 4G
		Mecp2flox/y=9 neurons from 3 mice	1.942±0.1148	P = 0.8697	Chat vs. cKO> 0.9999
		Chat-Mecp2-/y=15 neurons from 5 mice	1.933±0.09705	F (2, 36) = 0.1402	MeCP2-Flox vs. cKO> 0.9999
	after-hyperpolarization potential (ahp) (mV)	Chat cre=15 neurons from 4 mice	20.99±2.840	one-way ANOVA with Bonferroni's multiple comparisons test	Chat vs. MeCP2-Flox> 0.9999	Fig. 3-fig. supplement 4H
		Mecp2flox/y=9 neurons from 3 mice	22.59±1.869	P = 0.8929	Chat vs. cKO> 0.9999
		Chat-Mecp2-/y=15 neurons from 5 mice	20.57±2.961	F (2, 36) = 0.1137	MeCP2-Flox vs. cKO> 0.9999
Averaged frequency of NAc neurons infected by AAV-GFP or AAV/Mecp2	firing frequency(Hz)	Chat Cre-AAV8/GFP=9 neurons from 3 mice	4.567±0.9236	one-way ANOVA with Tukey's multiple comparisons test	cKO-con vs. Chat-con=0.0050	Fig.3F
		Chat-Mecp2-/y-AAV8/GFP=9 neurons from 3 mice	1.565±0.3103	P = 0.0061	cKO-con vs. cKO-mecp2=0.05
		Chat-Mecp2-/y-AAV8/Mecp2=12 neurons from 3 mice	3.525±0.4196	F (2, 27) = 6.201
mIPSC amplitude of NAc cholinergic interneurons	mIPSC amplitude (pA)	Chat Cre=12 neurons from 4 mice	31.03±1.913	one-way ANOVA with Bonferroni's multiple comparisons test	Chat vs. MeCP2-Flox=0.7201	Fig.3H
		Mecp2flox/y=14 neurons from 4 mice	28.06±0.8676	P < 0.0001	Chat vs. cKO=0.0013
		Chat-Mecp2-/y=16 neurons from 4 mice	40.34±1.979	F (2, 39) = 15.46	MeCP2-Flox vs. cKO< 0.0001
mIPSC frequency of NAc cholinergic interneurons	mIPSC frequency(Hz)	Chat Cre=12 neurons from 4 mice	2.738±0.3437	one-way ANOVA with Bonferroni's multiple comparisons test	Chat vs. MeCP2-Flox=0.4119	Fig. 3-fig. supplement 5A
		Mecp2flox/y=14 neurons from 4 mice	2.063±0.1753	P = 0.2282	Chat vs. cKO> 0.9999
		Chat-Mecp2-/y=16 neurons from 4 mice	2.690±0.3464	F (2, 39) = 1.535	MeCP2-Flox vs. cKO=0.4144
percentage of ChAT or PV-positive cells co-expressing GABAA α2 receptor	percentage of ChAT co-expressing GABAA α2 receptor	n = 8 sections from 2 WT mice	70.21 ± 4.408			Fig.3I
	percentage of PV co-expressing GABAA α2 receptor		3.461 ± 1.708
Immunoblotting of GABAA α2 receptor in NAc extracts	GABAA α2 Protein quantity (Relative to control)	Chat cre=15 mice	1.000 ± 0.07362	Two-tailed Unpaired t test		Fig.3J
		Chat-Mecp2-/y=15 mice	1.221 ± 0.07162	t=2.153 df=28 p=0.0401
Immunoblotting of GABAA α1 receptor in NAc extracts	GABAA α1 Protein quantity (Relative to control)	Chat cre=7 mice	1.000 ± 0.1251	Two-tailed Unpaired t test		Fig. 3-fig. supplement 5C
		Chat-Mecp2-/y=7 mice	1.150 ± 0.4228	t=0.3411 df=12 p=0.7390
integrated immunofluorescence data for GABAA α2 receptor	GABAA α2 integrated density (Relative to control)	Chat cre=9 sections from 2 mice	1.069 ± 0.1440	Two-tailed Unpaired t test		Fig.3K
		Chat-Mecp2-/y=7 sections from 2 mice	1.744 ± 0.1775	t=2.986 df=14 p=0.0098
spontaneous spiking of NAc cholinergic neurons in control mice treated with L-838,417	firing frequency(Hz)	ACSF=14 neurons from 4 mice	4.600 ± 0.7151	Two-tailed Unpaired t test		Fig.3M
		L-838417=13 neurons from 4 mice	1.469 ± 0.2700	t=3.977 df=25 p=0.0005
spontaneous spiking of NAc cholinergic neurons in cKO mice treated with L-838,417	firing frequency(Hz)	ACSF=11 neurons from 3 mice	2.771 ± 0.3078	Two-tailed Unpaired t test		Fig. 3-fig. supplement 5D
		L-838417=10 neurons from 3 mice	1.568 ± 0.3756	t=2.496 df=19 p=0.0219
sIPSC of NAc cholinergic neurons in control mice treated with L-838,417	sIPSC amplitude (pA)	ACSF=11 neurons from 3 mice	35.96 ± 1.211	Two-tailed Unpaired t test		Fig. 3-fig. supplement 5E
		L-838417=11 neurons from 3 mice	41.85 ± 1.823	t=2.688 df=20 p=0.0141
	sIPSC frequency(Hz)	ACSF=11 neurons from 3 mice	4.639 ± 0.3358	Two-tailed Unpaired t test
		L-838417=11 neurons from 3 mice	5.624 ± 0.3279	t=2.099 df=20 p=0.0488
sIPSC of NAc cholinergic neurons in cKO mice treated with L-838,417	sIPSC amplitude (pA)	ACSF=10 neurons from 3 mice	41.77 ± 2.339	Two-tailed Unpaired t test		Fig. 3-fig. supplement 5F
		L-838417=10 neurons from 3 mice	50.58 ± 3.466	t=2.108 df=18 0.0493
	sIPSC frequency(Hz)	ACSF=10 neurons from 3 mice	4.807 ± 0.3280	Two-tailed Unpaired t test
		L-838417=10 neurons from 3 mice	7.980 ± 0.8354	t=3.536 df=18 0.0024
