# Supplementary material for: MeCP2 in cholinergic interneurons of nucleus accumbens regulates fear learning
Source: eLife. 2020 May 18;9:e55342. doi: 10.7554/eLife.55342 (PMC7259956; doi:10.7554/eLife.55342)
Supplement: Figure 4—source data 1. [file elife-55342-fig4-data1.xlsx]

## Sheet: Table S3
Figure 4-Source data 1: Statistical reporting of Figure 4
Assay	Measurement	N	Values (mean±s.e.m.)	Statistical test and P value	Post hoc test and P value	Figure
fear condition test chemogenetic activation	freezing time(%) context fear	Chat Cre-AAV/mCherry=10 mice	45.76±6.665	one-way ANOVA with Bonferroni's multiple comparisons test	cKO-con vs. Chat-con=0.0020	Fig.4B
		Chat-Mecp2-/y-AAV/mCherry=10 mice	15.56±3.458	P = 0.0022	cKO-con vs. cKO-hM3D=0.0425
		Chat-Mecp2-/y-AAV/hM3Dq=9 mice	36.73±6.353	F (2, 26) = 7.801
	freezing time(%) tone fear	Chat Cre-AAV/mCherry=10 mice	85.26±1.965	one-way ANOVA with Bonferroni's multiple comparisons test	cKO-con vs. Chat-con=0.0041	Fig.4C
		Chat-Mecp2-/y-AAV/mCherry=10 mice	64.39±6.296	P = 0.0025	cKO-con vs. cKO-hM3D=0.0149
		Chat-Mecp2-/y-AAV/hM3Dq=9 mice	82.75±2.606	F (2, 26) = 7.583
fear condition test optogenetic activation	freezing time(%) context fear	Chat Cre-AAV/mCherry=8 mice	35.61±7.133	one-way ANOVA with Bonferroni's multiple comparisons test	cKO-con vs. Chat-con=0.0030	Fig.4E
		Chat-Mecp2-/y-AAV/mCherry=14 mice	10.52±1.363	P = 0.0004	cKO-con vs. cKO-ChR2=0.0015
		Chat-Mecp2-/y-AAV/ChR2=9 mice	36.42±6.955	F (2, 28) = 10.50
	freezing time(%) tone fear	Chat Cre-AAV/mCherry=8 mice	81.53±3.040	one-way ANOVA with Bonferroni's multiple comparisons test	cKO-con vs. Chat-con=0.0145	Fig.4F
		Chat-Mecp2-/y-AAV/mCherry=14 mice	56.82±5.958	P = 0.0053	cKO-con vs. cKO-ChR2=0.0245
		Chat-Mecp2-/y-AAV/ChR2=9 mice	78.96±5.656	F (2, 28) = 6.356
spontaneous firing after CNO treatment of hM3Dq-mCherry expressing ChAT neurons in Chat-Mecp2-/y mice	firing frequency(Hz)	before CNO=6 neurons from 3 mice	1.606±0.3054	Two-tailed Paired t test	CNO - Baseline=2.456±0.5527	Fig. 4-fig. supplement 6B
		after CNO=6 neurons from 3 mice	4.061±0.5527	t=4.442 df=5 p=0.0067
chemogenetic activation Trial 4 during learning	freezing time(%)	Chat Cre-AAV/mCherry=10 mice	61.77±4.899	one-way ANOVA with Bonferroni's multiple comparisons test	cKO-con vs. Chat-con=0.0072	Fig. 4-fig. supplement 6C
		Chat-Mecp2-/y-AAV/mCherry=10 mice	39.72±3.275	P = 0.0122	cKO-con vs. cKO-hM3D=0.1148
		Chat-Mecp2-/y-AAV/hM3Dq=9 mice	53.8±6.502	F (2, 26) = 5.245
optogenetic activation Trial 4 during learning	freezing time(%)	Chat Cre-AAV/mCherry=8 mice	61.00±7.072	one-way ANOVA with Bonferroni's multiple comparisons test	cKO-con vs. Chat-con=0.0290	Fig. 4-fig. supplement 6E
		Chat-Mecp2-/y-AAV/mCherry=14 mice	34.63±6.933	P = 0.0262	cKO-con vs. cKO-ChR2=0.0846
		Chat-Mecp2-/y-AAV/ChR2=9 mice	55.38±6.492	F (2, 28) = 4.160
freezing time in chamber without shock during chemogenetic activation	freezing time(%)	Chat Cre-AAV/mCherry=10 mice	4.466±0.4231	one-way ANOVA with Bonferroni's multiple comparisons test	cKO-con vs. Chat-con=0.4819	Fig. 4-fig. supplement 6F
		Chat-Mecp2-/y-AAV/mCherry=10 mice	3.568±0.6217	P = 0.2332	cKO-con vs. cKO-hM3D> 0.9999
		Chat-Mecp2-/y-AAV/hM3Dq=9 mice	3.157±0.5513	F (2, 26) = 1.541
freezing time in chamber without shock during optogenetic activation	freezing time(%)	Chat Cre-AAV/mCherry=8 mice	2.965±1.814	one-way ANOVA with Bonferroni's multiple comparisons test	cKO-con vs. Chat-con> 0.9999	Fig. 4-fig. supplement 6G
		Chat-Mecp2-/y-AAV/mCherry=14 mice	4.069±1.281	P = 0.8434	cKO-con vs. cKO-ChR2> 0.9999
		Chat-Mecp2-/y-AAV/ChR2=9 mice	3.395±0.9349	F (2, 28) = 0.1714
open field test chemogenetic activation	total distance(m)	Chat Cre-AAV/mCherry=6 mice	33.39±4.002	one-way ANOVA with Bonferroni's multiple comparisons test	cKO-con vs. Chat-con> 0.9999	Fig. 4-fig. supplement 6H
		Chat-Mecp2-/y-AAV/mCherry=8 mice	30.77±2.959	P = 0.8929	cKO-con vs. cKO-hM3D> 0.9999
		Chat-Mecp2-/y-AAV/hM3Dq=9 mice	31.27±3.941	F (2, 21) = 0.1139
