# Supplementary material for: MeCP2 in cholinergic interneurons of nucleus accumbens regulates fear learning
Source: eLife. 2020 May 18;9:e55342. doi: 10.7554/eLife.55342 (PMC7259956; doi:10.7554/eLife.55342)
Supplement: Figure 5—source data 1. [file elife-55342-fig5-data1.xlsx]

## Sheet: Table S3
Figure 5-Source data 1: Statistical reporting of Figure 5
Assay	Measurement	N	Values (mean±s.e.m.)	Statistical test and P value	Post hoc test and P value	Figure
fear condition test chemogenetic inhibition in NAc	freezing time(%) context fear	Chat Cre-AAV/mCherry=16 mice	37.14 ± 3.460	Two-tailed Unpaired t test		Fig 5B
		Chat Cre-AAV/hM4Di=18 mice	23.22 ± 2.709	t=3.204 df=32 p=0.0031
	freezing time(%) tone fear	Chat Cre-AAV/mCherry=16 mice	69.27 ± 3.161	Two-tailed Unpaired t test		Fig 5C
		Chat Cre-AAV/hM4Di=18 mice	54.23 ± 2.805	t=3.572 df=32 p=0.0011
fear condition test chemogenetic inhibition in NAc subregions	freezing time(%) context fear	chat cre-control=7	37.88 ± 3.638	Two-tailed Unpaired t test		Fig. 5D
		chat cre-NpHR(NAc)=6	23.23 ± 4.602	t=2.530 df=11 p=0.0280
	freezing time(%) tone fear	chat cre-control=7	73.65 ± 2.808	Two-tailed Unpaired t test		Fig. 5E
		chat cre-NpHR(NAc)=6	52.81 ± 6.688	t=3.038 df=11 p=0.0113
	freezing time(%) context fear	chat cre-control=7	37.88 ± 3.638	Two-tailed Unpaired t test		Fig. 5D
		chat cre-NpHR(NAc core)=8	20.57 ± 3.072	t=3.662 df=13 p=0.0029
	freezing time(%) tone fear	chat cre-control=7	73.65 ± 2.808	Two-tailed Unpaired t test		Fig. 5E
		chat cre-NpHR(NAc core)=8	57.37 ± 5.299	t=2.600 df=13 p=0.0220
	freezing time(%) context fear	chat cre-control=7	37.88 ± 3.638	Two-tailed Unpaired t test		Fig. 5D
		chat cre-NpHR(NAc medial shell)=8	31.56 ± 3.860	t=1.179 df=13 p=0.2593
	freezing time(%) tone fear	chat cre-control=7	73.65 ± 2.808	Two-tailed Unpaired t test		Fig. 5E
		chat cre-NpHR(NAc medial shell)=8	50.87 ± 4.453	t=4.181 df=13 p=0.0011
	freezing time(%) context fear	chat cre-control=7	37.88 ± 3.638 N=7	Two-tailed Unpaired t test		Fig. 5D
		chat cre-NpHR(NAc ventral medial shell)=8	15.64 ± 2.511 N=8	t=5.140 df=13 p=0.0002
	freezing time(%) tone fear	chat cre-control=7	73.65 ± 2.808 N=7	Two-tailed Unpaired t test		Fig. 5E
		chat cre-NpHR(NAc ventral medial shell)=8	53.48 ± 5.711 N=8	t=3.026 df=13 p=0.0097
spontaneous spiking recorded from AAV/RNAi-infected cholinergic interneurons in NAc	firing frequency(Hz)	Chat Cre-AAV/Sham=13 neurons from 3 mice	4.554±0.3999	one-way ANOVA with Newman-Keuls multiple comparisons test	q(Chat-con vs. cKO-con)=7.327****	Fig.5H
		Chat-Mecp2-/y-AAV/Sham=10 neurons from 3 mice	1.763±0.2702	P < 0.0001	q(cKO-con vs. cKO-a2)=6.378****
		Chat-Mecp2-/y-AAV/α2RNAi=9 neurons from 3 mice	4.417±0.6853	F (3, 40) = 33.06	q(cKO-a2 vs. cKO-a2&NpHR)=10.87****
		Chat-Mecp2-/y-AAV/α2RNAi & AAV/NpHR=12 neurons from 4 mice	0.0750 ± 0.0444
fear condition test	freezing time(%) context fear	Chat Cre-AAV/Sham=8 mice	35.44±6.431	one-way ANOVA with Newman-Keuls multiple comparisons test	q(Chat-con vs. cKO-con)=3.614*	Fig.5I
		Chat-Mecp2-/y-AAV/Sham=10 mice	15.02±2.522	P = 0.0015	q(cKO-con vs. cKO-a2)=4.782**
		Chat-Mecp2-/y-AAV/α2RNAi=21 mice	36.9±4.473	F (3, 44) = 6.066	q(cKO-a2 vs. cKO-a2&NpHR)=4.478**
		Chat-Mecp2-/y-AAV/α2RNAi & AAV/NpHR=9 mice	15.66 ± 4.053
	freezing time(%) tone fear	Chat Cre-AAV/Sham=8 mice	73.76±5.398	one-way ANOVA with Newman-Keuls multiple comparisons test	q(Chat-con vs. cKO-con)=4.168*	Fig.5J
		Chat-Mecp2-/y-AAV/Sham=10 mice	45.88±7.701	P = 0.0029	q(cKO-con vs. cKO-a2)=4.532**
		Chat-Mecp2-/y-AAV/α2RNAi=21 mice	70.43±3.713	F (3, 44) = 5.426	q(cKO-a2 vs. cKO-a2&NpHR)=3.621*
		Chat-Mecp2-/y-AAV/α2RNAi & AAV/NpHR=9 mice	50.79 ± 8.461
open field test	total distance(m)	Chat Cre-AAV/Sham=7 mice	31.81±3.936	one-way ANOVA with Newman-Keuls multiple comparisons test		Fig.5K
		Chat-Mecp2-/y-AAV/Sham=8 mice	39.94±3.305	P = 0.4071
		Chat-Mecp2-/y-AAV/α2RNAi=20 mice	32.38±2.815	F (3, 40) = 0.9904
		Chat-Mecp2-/y-AAV/α2RNAi & AAV/NpHR=12 mice	32.52 ± 3.522
