# Supplementary material for: MeCP2 in cholinergic interneurons of nucleus accumbens regulates fear learning
Source: eLife. 2020 May 18;9:e55342. doi: 10.7554/eLife.55342 (PMC7259956; doi:10.7554/eLife.55342)
Supplement: Figure 6—source data 1. [file elife-55342-fig6-data1.xlsx]

## Sheet: Table S3
Figure 6-Source data 1: Statistical reporting of Figure 6
Assay	Measurement	N	Values (mean±s.e.m.)	Statistical test and P value	Post hoc test and P value	Figure
mIPSC amplitude of AAV/RNAi-infected NAc neurons	mIPSC amplitude (pA)	Chat Cre-AAV/Sham=14 neurons from 4 mice	31.89±2.191	one-way ANOVA with Bonferroni's multiple comparisons test	Chat Cre-AAV/Sham vs. Chat-Mecp2-/y-AAV/Sham=0.0073	Fig.6C
		Chat-Mecp2-/y-AAV/Sham=14 neurons from 4 mice	40.58±1.898	P = 0.0062	Chat-Mecp2-/y-AAV/Sham vs. Chat-Mecp2-/y-AAV/α2RNAi =0.0460
		Chat-Mecp2-/y-AAV/α2RNAi=14 neurons from 4 mice	33.78±1.539	F (2, 39) = 5.816
mIPSC frequency of AAV/RNAi-infected NAc neurons	mIPSC frequency (Hz)	Chat Cre-AAV/Sham=14 neurons from 4 mice	2.471±0.4503	one-way ANOVA with Bonferroni's multiple comparisons test	Chat Cre-AAV/Sham vs. Chat-Mecp2-/y-AAV/Sham> 0.9999	Fig. 6-fig. supplement 8
		Chat-Mecp2-/y-AAV/Sham=14 neurons from 4 mice	2.022±0.2936	P = 0.3541	Chat-Mecp2-/y-AAV/Sham vs. Chat-Mecp2-/y-AAV/α2RNAi > 0.9999
		Chat-Mecp2-/y-AAV/α2RNAi=14 neurons from 4 mice	1.763±0.2682	F (2, 39) = 1.066
integrated immunofluorescence data of α2-GABAA receptors	GABAA α2 integrated density normalized to AAV/GFP levels	Chat-Mecp2-/y-AAV/Sham=14 neurons from 3 mice	1.000 ± 0.1661	Two-tailed Unpaired t test		Fig.6E
		Chat-Mecp2-/y-AAV/α2RNAi=27 neurons from 3 mice	0.4528 ± 0.1003	t=2.985 df=39 p=0.0049
fear condition test with L838,417 treatment	freezing time(%) context fear	ACSF =14 mice	33.70 ± 4.236	Two-tailed Unpaired t test		Fig 6G
		L838,417=11 mice	18.49 ± 4.054	t=2.542 df=23 p=0.0182
	freezing time(%) tone fear	ACSF =14 mice	63.79 ± 3.177	Two-tailed Unpaired t test		Fig 6H
		L838,417=11 mice	44.08 ± 4.661	t=3.609 df=23 p=0.0015
